# Supplementary material
Source: Springer Nature journal article supplement (https://www.springermedizin.de/resource/supplementary/12967_2011_704_MOESM4_ESM.pdf/9577318)

**a.**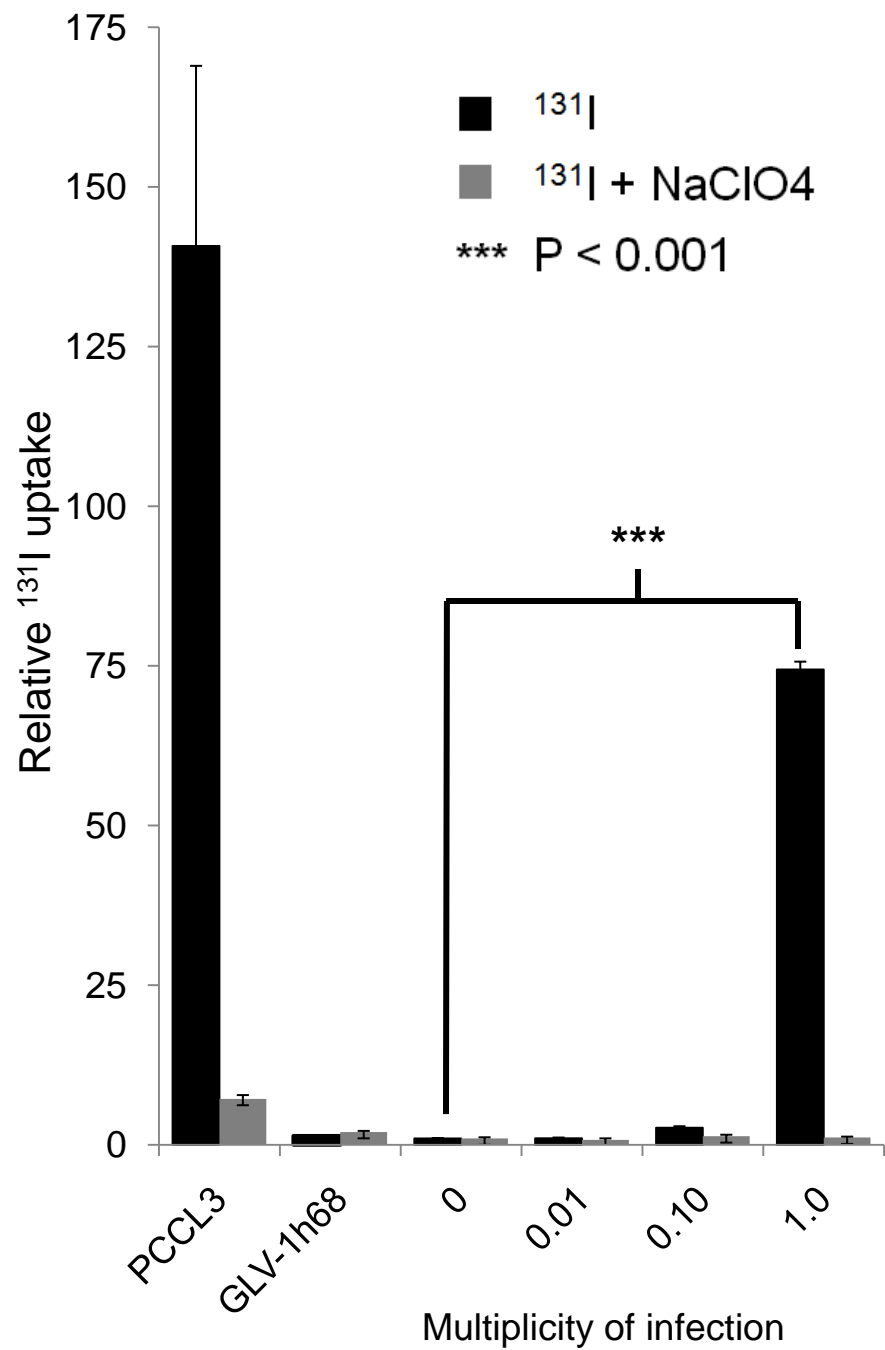**b.**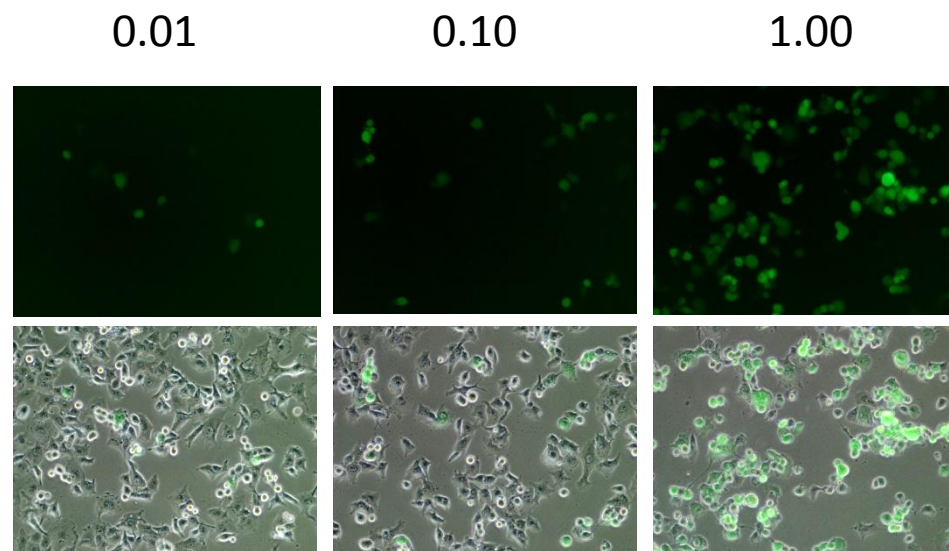

Supplement: MOESM4 [file 9577318]
